# Supplementary material for: Positioning of nucleosomes containing γ-H2AX precedes active DNA demethylation and transcription initiation
Source: PubMed Central journal article supplement (PMC7886895; doi:10.1038/s41467-021-21227-y), 2021-02-16
Supplement: 41467_2021_21227_MOESM1_ESM.pdf [file 41467_2021_21227_MOESM1_ESM.pdf]

## SUPPLEMENTARY INFORMATION for

# Positioning of nucleosomes containing $\gamma$ -H2AX precedes active DNA demethylation and transcription initiation

Stephanie Dobersch<sup>1, 2, 3</sup>, Karla Rubio<sup>1, 2, 4, 5</sup>, Indrabahadur Singh<sup>2, 6</sup>, Stefan Günther<sup>7, 8</sup>, Johannes Graumann<sup>9</sup>, Julio Cordero<sup>10, 11</sup>, Rafael Castillo-Negrete<sup>1, 2</sup>, Minh Bao Huynh<sup>12</sup>, Aditi Mehta<sup>2, 13</sup>, Peter Braubach<sup>14, 15</sup>, Hector Cabrera-Fuentes<sup>16-19</sup>, Jürgen Bernhagen<sup>20, 21</sup>, Cho-Ming Chao<sup>22, 23</sup>, Saverio Bellusci<sup>22-25</sup>, Andreas Günther<sup>24-27</sup>, Klaus T Preissner<sup>16, 24</sup>, Sita Kugel<sup>3</sup>, Gergana Dobрева<sup>10, 11</sup>, Malgorzata Wygrecka<sup>16, 24, 25, 28</sup>, Thomas Braun<sup>8, 24</sup>, Dulce Papy-Garcia<sup>12</sup> and Guillermo Barreto<sup>1, 2, 4, 5, 24, 25, \*</sup>

This PDF file includes: Supplementary Introduction, Supplementary Results. Supplementary Discussion, Supplementary Figures 1 to 10, Supplementary Table 1, Supplementary Table 2 and Supplementary References

Other Supplementary Materials for this manuscript include the following:

Source Data file 01: The source data for all the plots including the values for statistical significance and the implemented statistical tests in all plots presented in the article.

Source Data file 02: The uncropped pictures of all the blots presented in the main and Supplementary Figures.

Source Data file 03: Relevant instrumentation parameters used during mass spectrometry analysis were extracted using MARMoSET.

Source Data file 04: Data sheets containing ChIP-seq, RNA-seq and mass spectrometry based proteomic presented in Figures 1c, 3a, 3b, 4b, 8a, 8b, 9a and 9b. See Source Data file01.

## **Supplementary Introduction**

Histone variants are strongly conserved among species, suggesting that they arose at an early stage in evolution.

HMG proteins are divided into three families based on their DNA binding domains: HMGA (containing AT-hooks), HMGB (containing HMG-boxes) and HMGN (containing nucleosomal binding domains)<sup>1,2</sup>.

Under normal circumstances fibroblasts are important for wound healing and connective tissue production. However, in the fibrotic lung their function is impaired resulting in formation of fibroblastic foci, which consist of highly proliferative fibroblasts, immune cells, and excessive extracellular matrix (ECM) protein deposition, such as fibronectin (FN1) and collagen (COL1A1)<sup>3</sup>. Consequently, these processes result in disproportionate levels of scar tissue, alterations of the lung epithelium structure and loss of the gas exchange function of the lung.

## **Supplementary Results**

### **HMGA2-lyase activity is required for pH2A.X deposition and solving of R-loops**

It has been reported that HMGA2 efficiently cleaves DNA generating single-strand breaks<sup>4</sup>. The arginine residues of the C-terminal AT-hook motif are crucial for this intrinsic lyase activity of HMGA2 (Supplementary Fig. 6a, top). Thus, to further elucidate the molecular mechanism of

HMGA2-mediated transcription activation, a lyase-deficient HMGA2 mutant was generated by substituting these arginine residues by alanine (RΔA HMGA2; Supplementary Fig. 6a, bottom). Further, *Hmga2*<sup>-/-</sup> MEF were stably transfected with a tetracycline-inducible expression construct containing the cDNA of RΔA HMGA2-MYC-HIS. Doxycycline treatment of these stably transfected MEF induced the expression of RΔA HMGA2-MYC-HIS to similar levels as in MEF containing WT HMGA2-MYC-HIS (Supplementary Fig. 6b, top). Furthermore, analysis of the chromatin-bound sub-nuclear fraction of these cells (Supplementary Fig. 6b, bottom) demonstrated that the R to A mutations did not significantly affect the binding of HMGA2 to chromatin. In addition, the loss of lyase activity in RΔA HMGA2-MYC-HIS was confirmed by monitoring DNA damage using Comet Assays<sup>5</sup> (Supplementary Fig. 6c) or by monitoring HMGA2-DNA complexes on dot blots (Supplementary Fig. 6d) after trapping experiments<sup>4</sup> using NaCNBH<sub>3</sub> as reducing agent to trap the Schiff base intermediates of the lyase reaction mediated by HMGA2. Furthermore, to demonstrate that the R to A mutations in the third AT-hook domain of HMGA2 do not affect the interaction with the FACT complex, we performed Co-IP of nuclear protein extracts from the stably transfected *Hmga2*<sup>-/-</sup> MEF described above (Supplementary Fig. 6e). IP using nuclear extracts and MYC-specific antibodies specifically co-precipitated both components of the FACT complex, SUPT16 and SSRP1, without significant differences between WT and RΔA HMGA2-MYC-HIS. Moreover, we analyzed the promoters of *Gata6*, *Mtor* and *Igfl* (Supplementary Fig. 6f) by ChIP using chromatin isolated from the same cells used for the Co-IP (Supplementary Fig. 6e). We found that the enrichment of WT and RΔA HMGA2-MYC-HIS was not significantly different at the *Igfl* promoter, whereas we observed an increased enrichment of RΔA HMGA2-MYC-HIS at the *Gata6* and *Mtor* promoters when compared to WT HMGA2-

MYC-HIS. These results indicate that the interaction with the FACT complex and the enrichment at the analyzed promoters was similar for WT and RΔA HMGA2.

## **Supplementary Discussion**

### **Targeting the HMGA2-FACT-ATM-pH2A.X axis to specific loci**

The presented experimental data robustly support the molecular mechanism proposed here. Nevertheless, this work should be considered as starting point of future projects that will elucidate exciting questions that remained open. For example, it is currently unclear how HMGA2 is targeted to specific promoters. One answer to this question might be the inducibility of specific genes in determined signaling pathways, including TGF $\beta$ , IGF and WNT signaling pathways, especially since they have been related to HMGA2<sup>6, 7, 8, 9</sup>. However, this is just a partial answer, since there are genes that are inducible by these signaling pathways in an HMGA2-independent manner, as the ones shown in clusters 2 and 4 of Fig. 8a, as well as there are HMGA2 target genes that are not induced by these signaling pathways. Interestingly, we have observed that ncRNAs are transcribed from virtually all top 15% candidates (Supplementary Fig. 7a-b). In addition, 38.5% of the genes inside the top 15% candidates contain high GC skews that favor the formation of R-loops (Supplementary Fig. 7f-g). The DNA-ncRNA hybrids of the R-loops might be an excellent option to tether HMGA2 to specific promoters. Similarly, triple-helical RNA-DNA-DNA structures (triplex) at enhancers and promoters allow lncRNAs to recruit protein complexes to specific genomic regions and regulate gene expression<sup>10, 11</sup>. Interestingly, Summer and colleagues demonstrated in a seminal work that HMGA2 binds and efficiently cleaves ssDNA

containing abasic sites *in vitro*<sup>4</sup>. It will be the scope of our future work to determine whether the binding affinity and the cleavage efficiency of HMGA2 increase when the DNA substrate for the intrinsic lyase activity of HMGA2 is part of a DNA-RNA hybrid in an R-loop. Supporting this line of ideas, Arab and colleagues recently reported in a pioneering work that GADD45A preferentially binds DNA-RNA hybrids and R-loops rather than ssDNA, dsDNA or RNA<sup>12</sup>. Strikingly, we have shown that loss of HMGA2 lyase activity increased R-loop levels (Fig. 6c-d), while binding of GADD45A to R-loops was reduced (Fig. 7g-h), thereby supporting the hypothesis that single-strand breaks of the DNA moiety in the DNA-RNA hybrids are required for GADD45A binding.

Another open question, from the mechanistic point of view, is related to the origin of the abasic sites that are bound and cleaved by HMGA2. Since 38% of the genes inside the top 15% candidates contain GC skews and active DNA demethylation is part of the mechanism of transcription initiation proposed here, a plausible explanation for the generation of abasic sites is the participation of DNA glycosylases that removes the bases from 5-methylcytosine (5mC) or thymine as deamination product of 5mC. In addition, HMGA2 has been shown to interact with APEX1 (apurinic/apyrimidinic site endonuclease 1)<sup>4</sup> and XRCC6 (X-ray repair cross-complementing protein 6, a ssDNA-dependent helicase also known as Ku70)<sup>13</sup>, thereby supporting the involvement of the base excision repair (BER) machinery during HMGA2 function. It will be interesting to perform functional experiments demonstrating the requirement of the BER machinery during the mechanism of transcription initiation proposed here. Supporting these ideas, various reports demonstrate that transcription, DNA damage, and repair are mechanistically and functionally intertwined<sup>14</sup>.

## **Opposite function of the HMGA2-FACT-ATM-pH2A.X axis and the MiCEE complex**

We have recently reported a mechanism of transcription repression mediated by the multicomponent RNA–protein complex MiCEE<sup>15</sup>. In addition, we have shown that in IPF reduced levels of the micro RNA lethal 7d (*MIRLET7D*, also known as *let-7*) and hyperactive EP300 compromise the epigenetic gene silencing mediated by the MiCEE complex<sup>16</sup>. The results presented here strongly imply an opposite function of the MiCEE complex and the HMGA2-FACT-ATM-pH2A.X axis in the context of TGFβ1 signaling and IPF. Supporting this line of evidence, it has been reported that *MIRLET7D* targets *HMGA2* mRNA, thereby preventing TGFβ1-induced EMT and renal fibrosis<sup>17</sup>. Further, reduction of mature *MIRLET7* levels by the oncofetal protein LIN28B allows HMGA2 to drive an epigenetic program during pancreatic ductal adenocarcinoma (PDAC), one of the most lethal malignancies<sup>18</sup>. It will be the scope of our future work to confirm the opposite function of the MiCEE complex and the HMGA2-FACT-ATM-pH2A.X axis within the context of fibrosis in different organs, including lung, kidney and liver.

**Supplementary Figures 1 to 10**

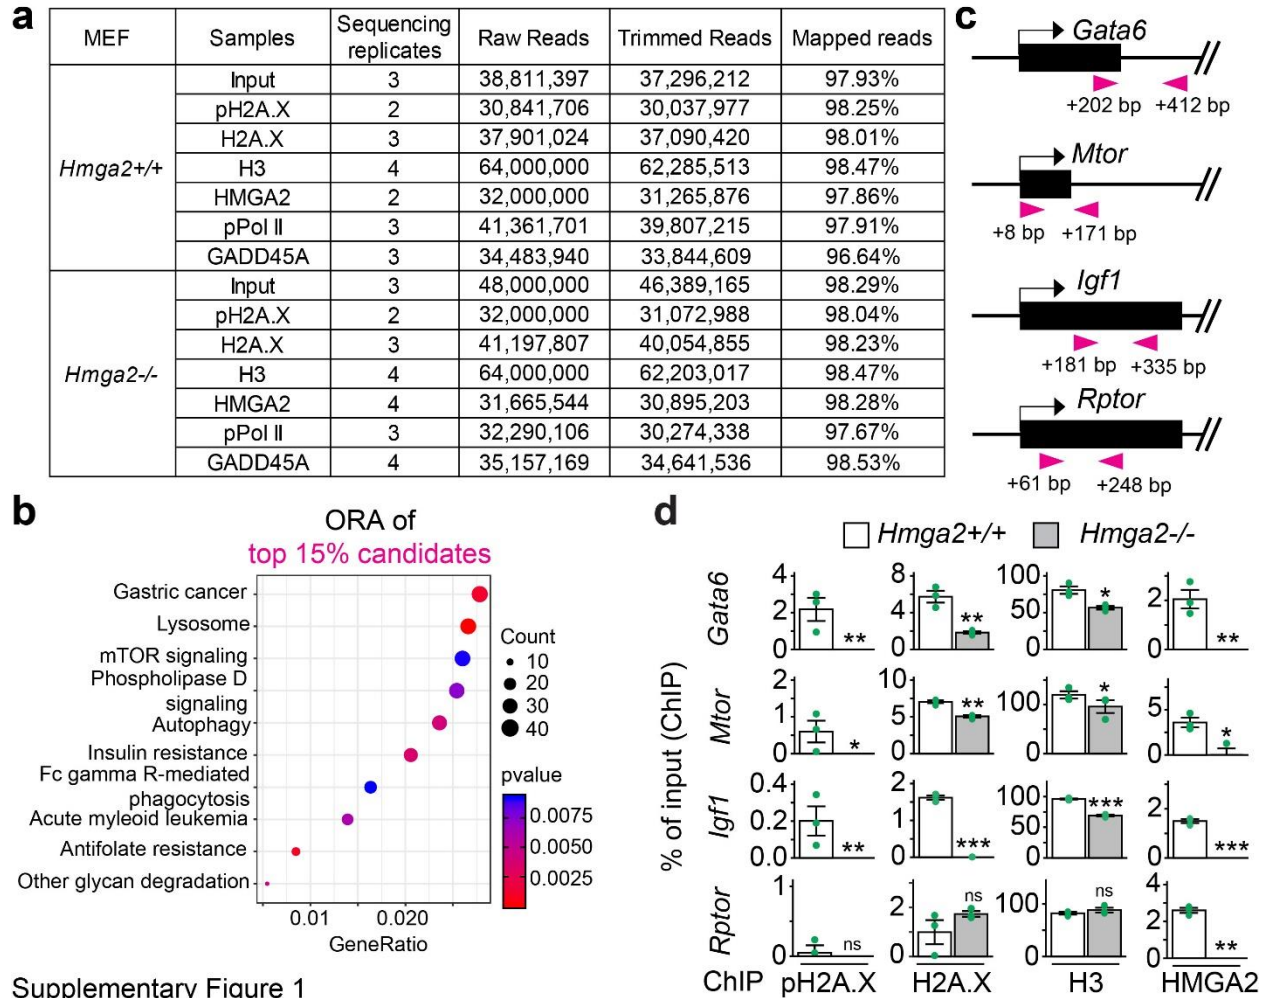

**Supplementary Figure 1: HMGA2 is required for pH2A.X deposition at TSS.** (a) Description of the ChIP-seq data set supports the quality of the experiment. (b) KEGG-based enrichment analysis of top 15 % candidate genes using clusterProfiler. Fisher's Exact Test was used to calculate the *P* values. (c) Schematic representation of the 5' genomic region of *Gata6*, *Mtor*, *Igf1* and *Rptor* showing exons (black boxes), introns (lines), arrows, direction of the genes and location of primer pairs (arrowheads) used for ChIP analysis. Number represents distance of the 5' primer to the TSS. (d) ChIP analysis of *Gata6*, *Mtor*, *Igf1* and *Rptor* TSS using specific antibodies as indicated and chromatin isolated from *Hmga2*<sup>+/+</sup> and *Hmga2*<sup>-/-</sup> MEF. In all plots, data are displayed as means

$\pm$  s.e.m ( $n=3$  biologically independent experiments); asterisks,  $P$  values after two-tailed  $t$ -Test, \*\*\* $P \leq 0.001$ ; \*\* $P \leq 0.01$ ; \* $P \leq 0.05$ ; ns, non-significant. Source data are provided as Source Data files 01 and 04.



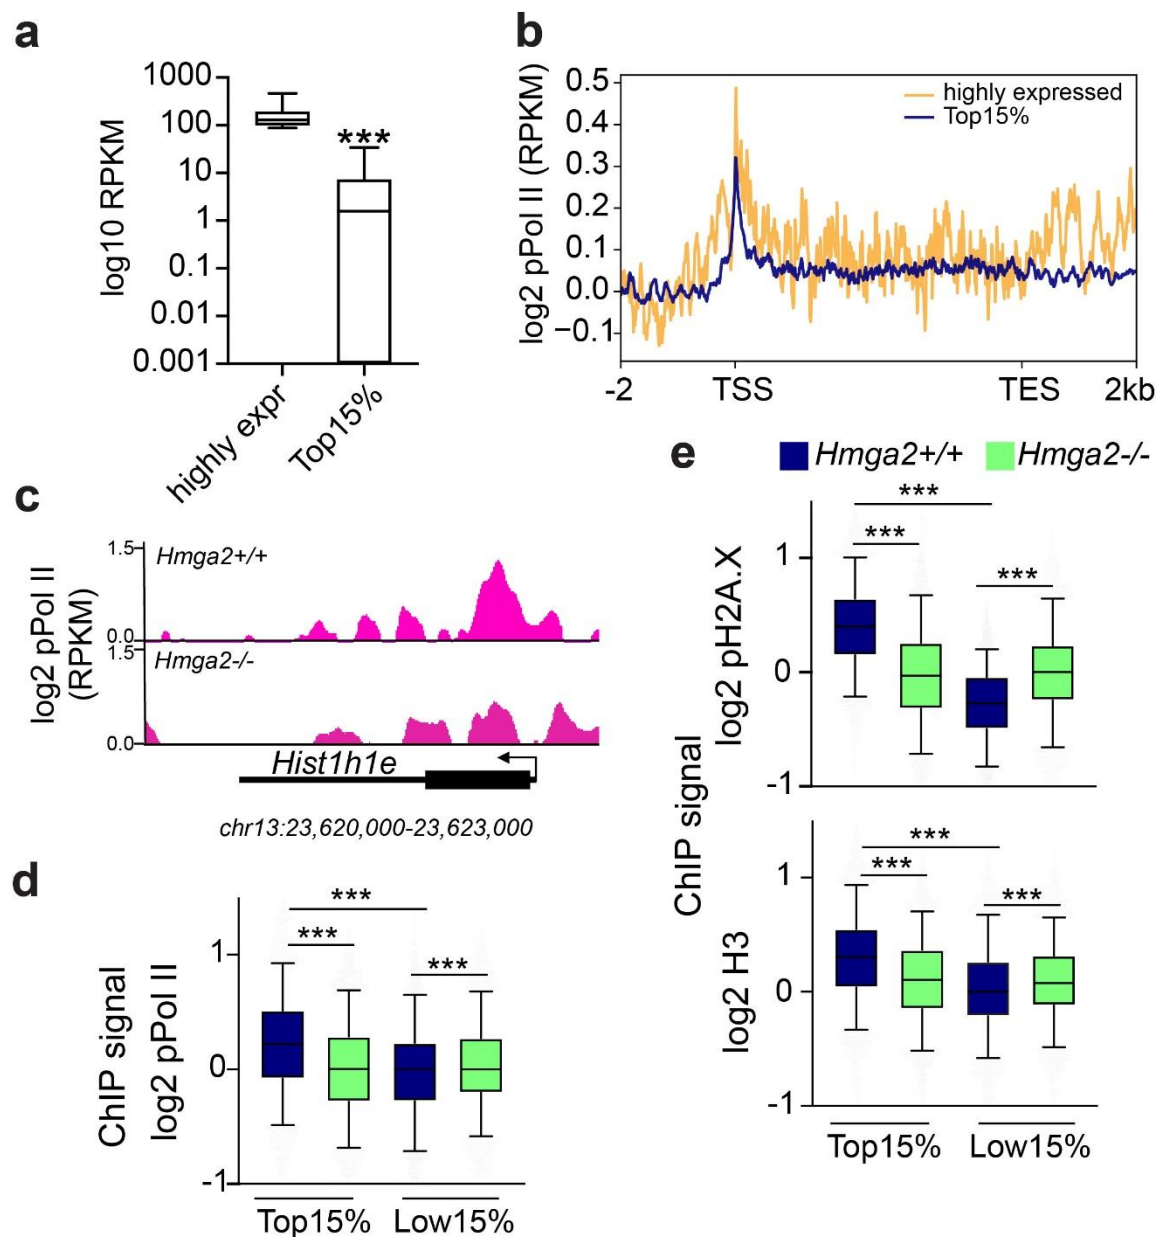

**Supplementary Figure 2: Top 15% candidate genes show low basal transcriptional activity.**

(a) Box plot representing the basal transcription activity (as log<sub>10</sub> RPKM) of the top 500 highly expressed genes ( $n=500$  genes) versus the top 15% candidate genes ( $n=9522$  genes) in *Hmga2*<sup>+/+</sup> MEF from one sequencing experiment. All box plots of this figure indicate median (middle line), 25th, 75th percentile (box) and 5th and 95th percentile (whiskers); asterisks,  $P$  values after two-

tailed Wilcoxon-Mann-Whitney test, \*\*\*  $P \leq 0.001$ . (b) Aggregate plots for phosphorylated serine 5 RNA polymerase II (pPol II) enrichment within the gene body  $\pm 2$ kb of the Top 500 highly expressed genes and the top 15% candidate genes in *Hmga2*<sup>+/+</sup> MEF. (c) Visualization of *Hist1h1e* gene locus using UCSC Genome Browser showing pPol II enrichment in *Hmga2*<sup>+/+</sup> and *-/-* MEF. *Hist1h1e* is found in the top 500 highly expressed genes. ChIP-seq reads were normalized using RPKM measure and are represented as log<sub>2</sub> enrichment over their corresponding inputs. Images represent the indicated gene loci with their genomic coordinates. Arrows, direction of the genes; black boxes, exons; dotted squares, regions selected for single gene analysis. (d) Box plots of ChIP-seq-based pPol II enrichment analysis within the TSS + 0.5kb of the top 15% candidates or lowest 15% (Low) in *Hmga2*<sup>+/+</sup> and *-/-* MEF ( $n=9522$  genes from one sequencing experiment). ChIP-seq reads were normalized using reads per kilobase per million (RPKM) measure and are represented as log<sub>2</sub> enrichment over their corresponding inputs. (e). Box plots of ChIP-seq-based pH2A.X (top) and H3 (bottom) enrichment analysis within the TSS + 0.5kb of the top 15% candidates or lowest 15% (Low) in *Hmga2*<sup>+/+</sup> and *-/-* MEF ( $n=9,522$  genes from one sequencing experiment). ChIP-seq reads were normalized using reads per kilobase per million (RPKM) measure and are represented as log<sub>2</sub> enrichment over their corresponding inputs. Source data are provided as a Source Data file 01.

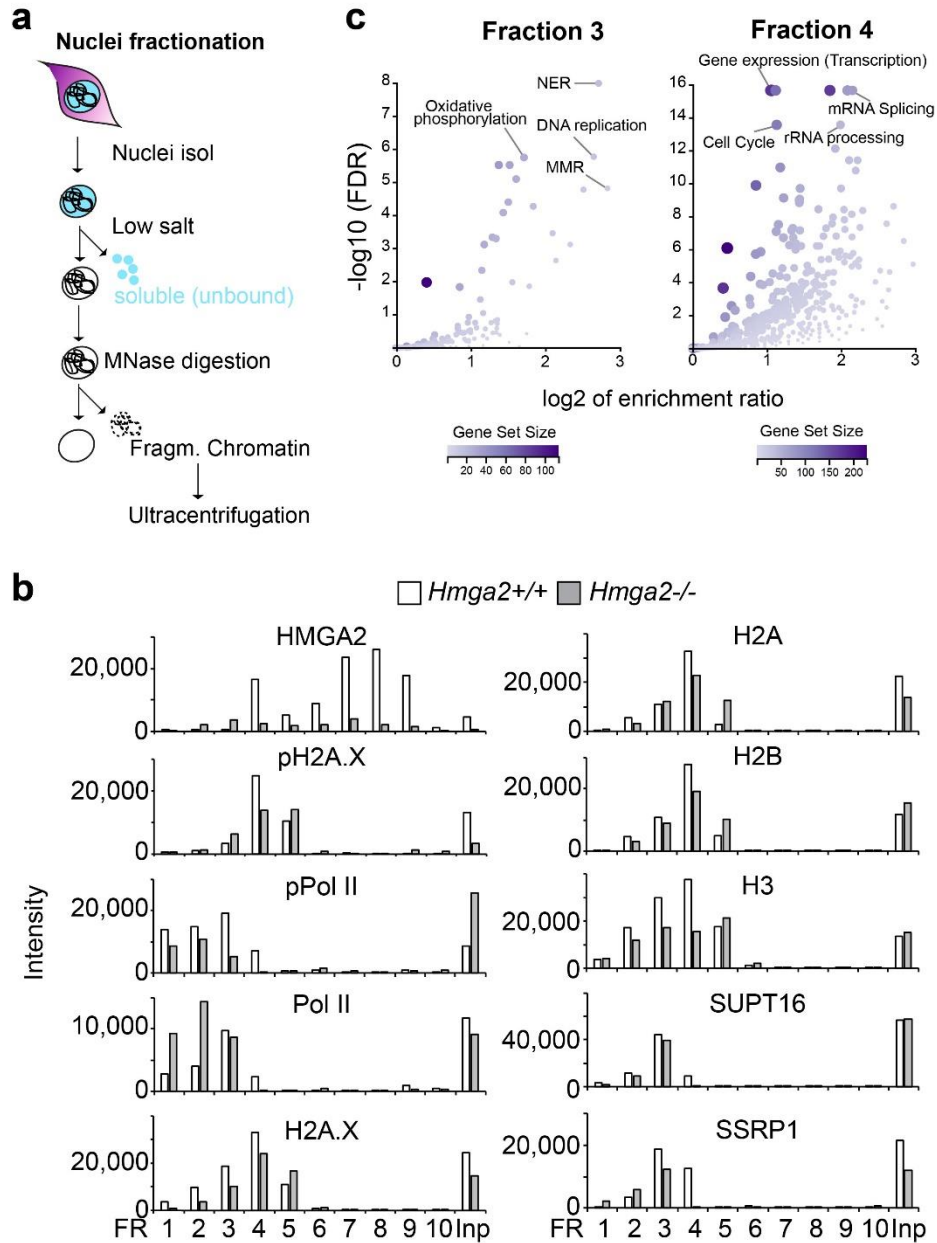

Supplementary Figure 3

**Supplementary Figure 3: Fractionation of native chromatin from *Hmga2*<sup>+/+</sup> and -/- MEF.**

(a) Schematic representation of the experimental outline. Chromatin was prepared and fractionated by micrococcus nuclease digestion. Samples were loaded onto a sucrose gradient and were separated by ultracentrifugation. (b) Densitometry analysis of western blots shown in Fig. 4a and

4d. (c) Left, KEGG-based and, right, Reactome-based enrichment analysis of proteins showing significant enrichment in *Hmga2*<sup>+/+</sup> as compared to *Hmga2*<sup>-/-</sup> MEF in fraction 3 and 4 using WEB-based gene set analysis toolkit, respectively.

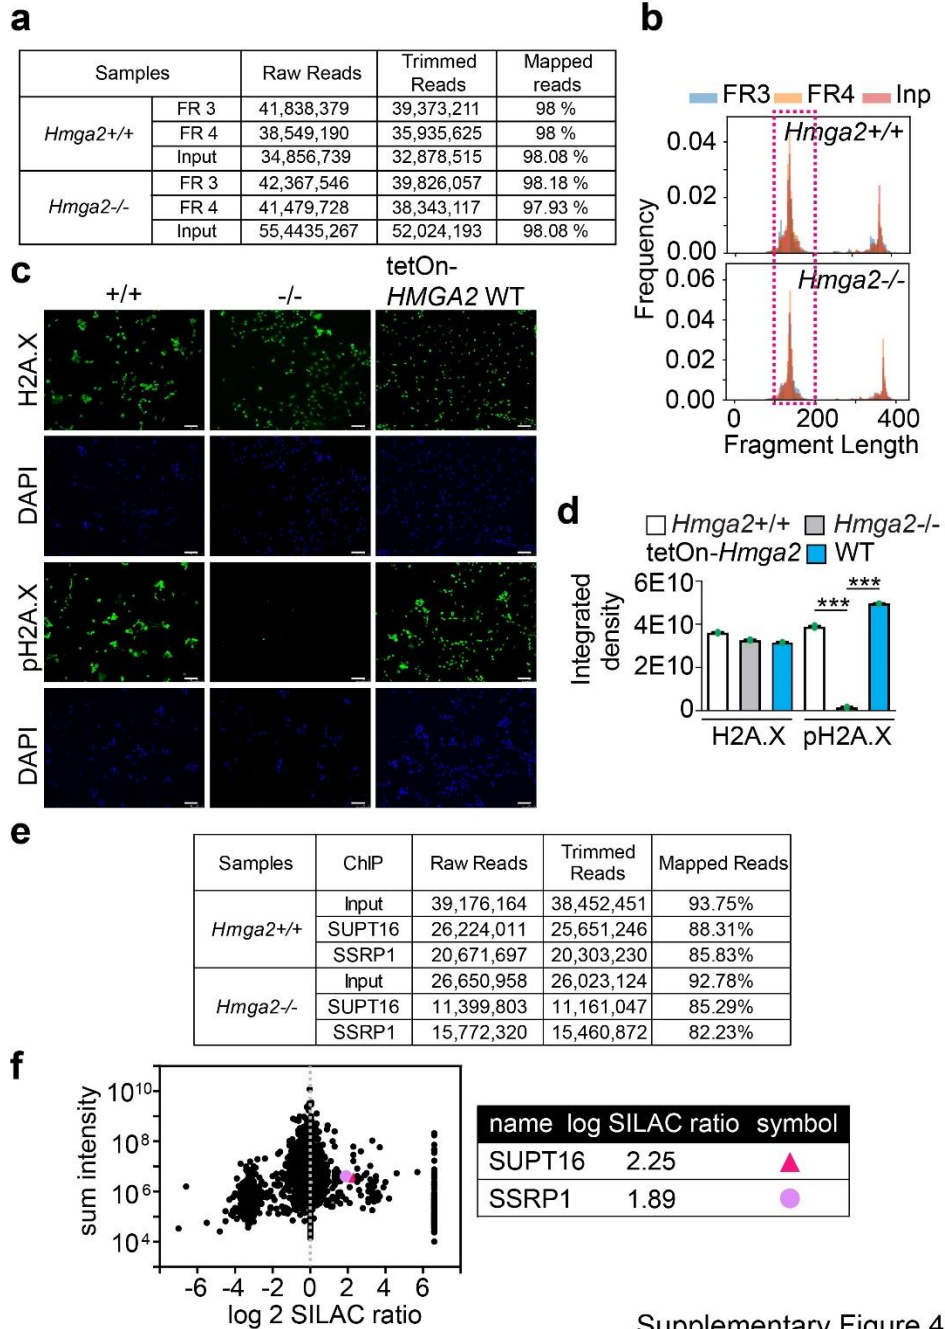

Supplementary Figure 4

**Supplementary Figure 4: Ectopic expression of HMGA2 in *Hmga2*<sup>-/-</sup> MEF restores pH2A.X**

**levels.** (a) and (e) Description of the MNase-seq (a), SUPT16 and SSRP1 ChIP-seq (e) data set supports the quality of the experiments. (b) Frequency of fragment length distribution of reads obtained from fraction 3 and 4 after paired-end sequencing. Reads with a length of 100 to 200 bp

were selected for further analysis. (c) Representative pictures of confocal microscopy after immunostaining using H2A.X or pH2A.X-specific antibodies in *Hmga2*<sup>+/+</sup>, *Hmga2*<sup>-/-</sup> MEF and *Hmga2*<sup>-/-</sup> MEF that were stably transfected with a tetracycline-inducible expression construct (tetOn) for WT *Hmga2*-myc-his. MEF were treated with doxycycline for 4 h. DAPI, nucleus. Scale bars, 75  $\mu$ m. (d) Quantification of the integrated density of immunofluorescence images from (c). Data are displayed as means  $\pm$  s.e.m ( $n=3$  independent experiments); asterisks,  $P$  values after two-tailed  $t$ -Test, \*\*\* $P \leq 0.001$ . (f) HMGA2-interacting proteins identified by mass spectrometry analysis published by<sup>7</sup>. Scatter plot between SILAC ratios and peak intensities (top); selected proteins with corresponding log<sub>2</sub> SILAC ratios of SUPT16 and SSRP1 (bottom).

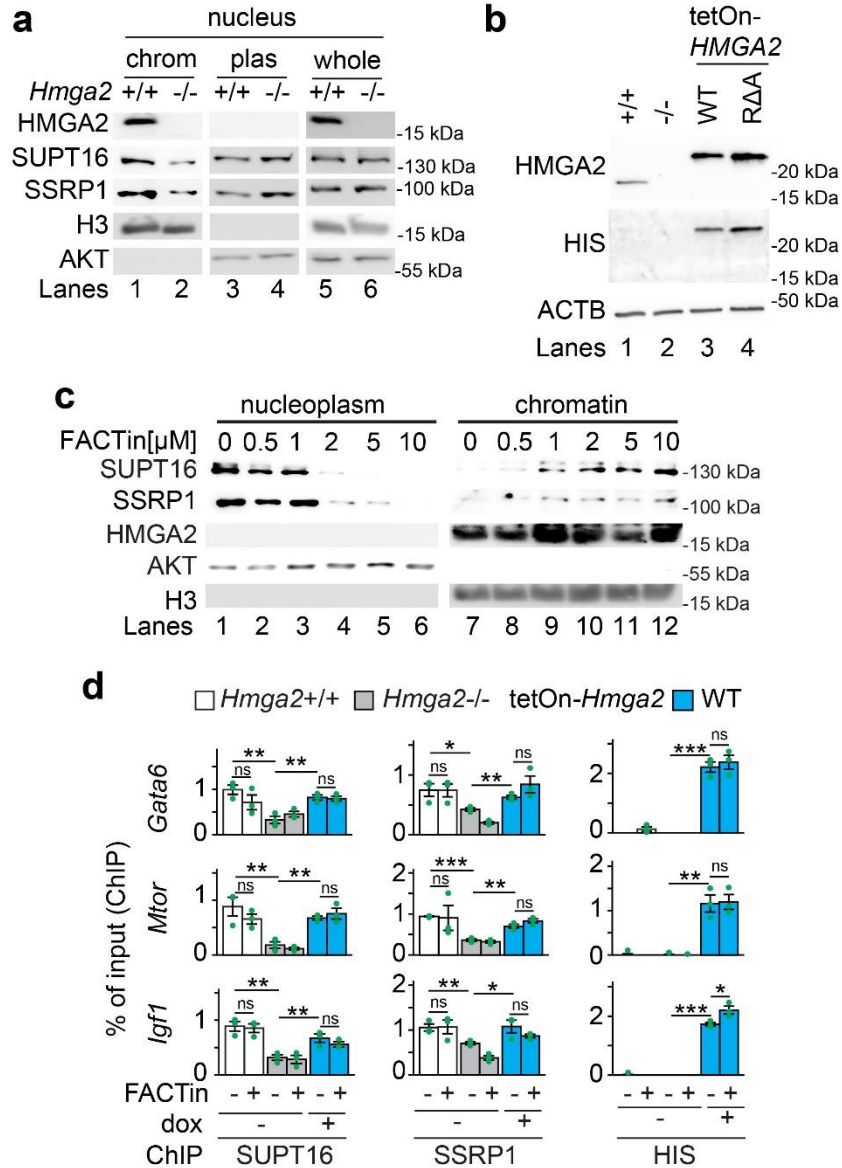

**Supplementary Figure 5: HMGA2 and FACTin increases FACT complex binding to chromatin.** (a) WB analysis of chromatin (chr), nucleoplasm (nuc pl) and nuclear lysates (nuc lys) from *Hmga2*<sup>+/+</sup> and *Hmga2*<sup>-/-</sup> MEF using the indicated antibodies. H3 and AKT were used as markers for chromatin and nucleoplasm, respectively. (b) WB analysis of nuclear lysates from *Hmga2*<sup>+/+</sup>, *Hmga2*<sup>-/-</sup> MEF, as well as *Hmga2*<sup>-/-</sup> MEF that were stably transfected with a tetracycline-inducible expression construct (tetOn) either for WT *Hmga2*-myc-his or the lyase-deficient mutant RΔA *Hmga2*-myc-his. MEF were treated with doxycycline for 24 h and lysates

were probed for the indicated antibodies. (c) *Hmga2*<sup>+/+</sup> MEF were treated for 2 h with the indicated concentrations of CBLC000 trifluoroacetate (FACTin). Afterwards, nucleoplasm and chromatin were isolated and analyzed by WB using the noted antibodies. AKT and H3 were used as nucleoplasm and chromatin markers, respectively. WB images presented in panels (a) to (c) are representative for three independent experiments, respectively. (d) CHIP-based promoter analysis of *Gata6*, *Mtor* and *Igf1* using the indicated antibodies and chromatin from *Hmga2*<sup>+/+</sup>, *Hmga2*<sup>-/-</sup> MEF, as well as *Hmga2*<sup>-/-</sup> MEF that were stably transfected with a tetracycline-inducible expression construct (tetOn) for WT *Hmga2-myc-his*. MEF were treated with doxycycline and FACT inhibitor (FACTin; CBLC000 trifluoroacetate) as indicated. Data are displayed as means  $\pm$  s.e.m ( $n=3$  independent experiments); asterisks,  $P$  values after one tailed  $t$ -Test, \*\*\*\* $P \leq 0.001$ ; \*\* $P \leq 0.01$ ; \* $P \leq 0.05$ ; ns, non-significant. Source data are provided as a Source Data file 01 and 02.



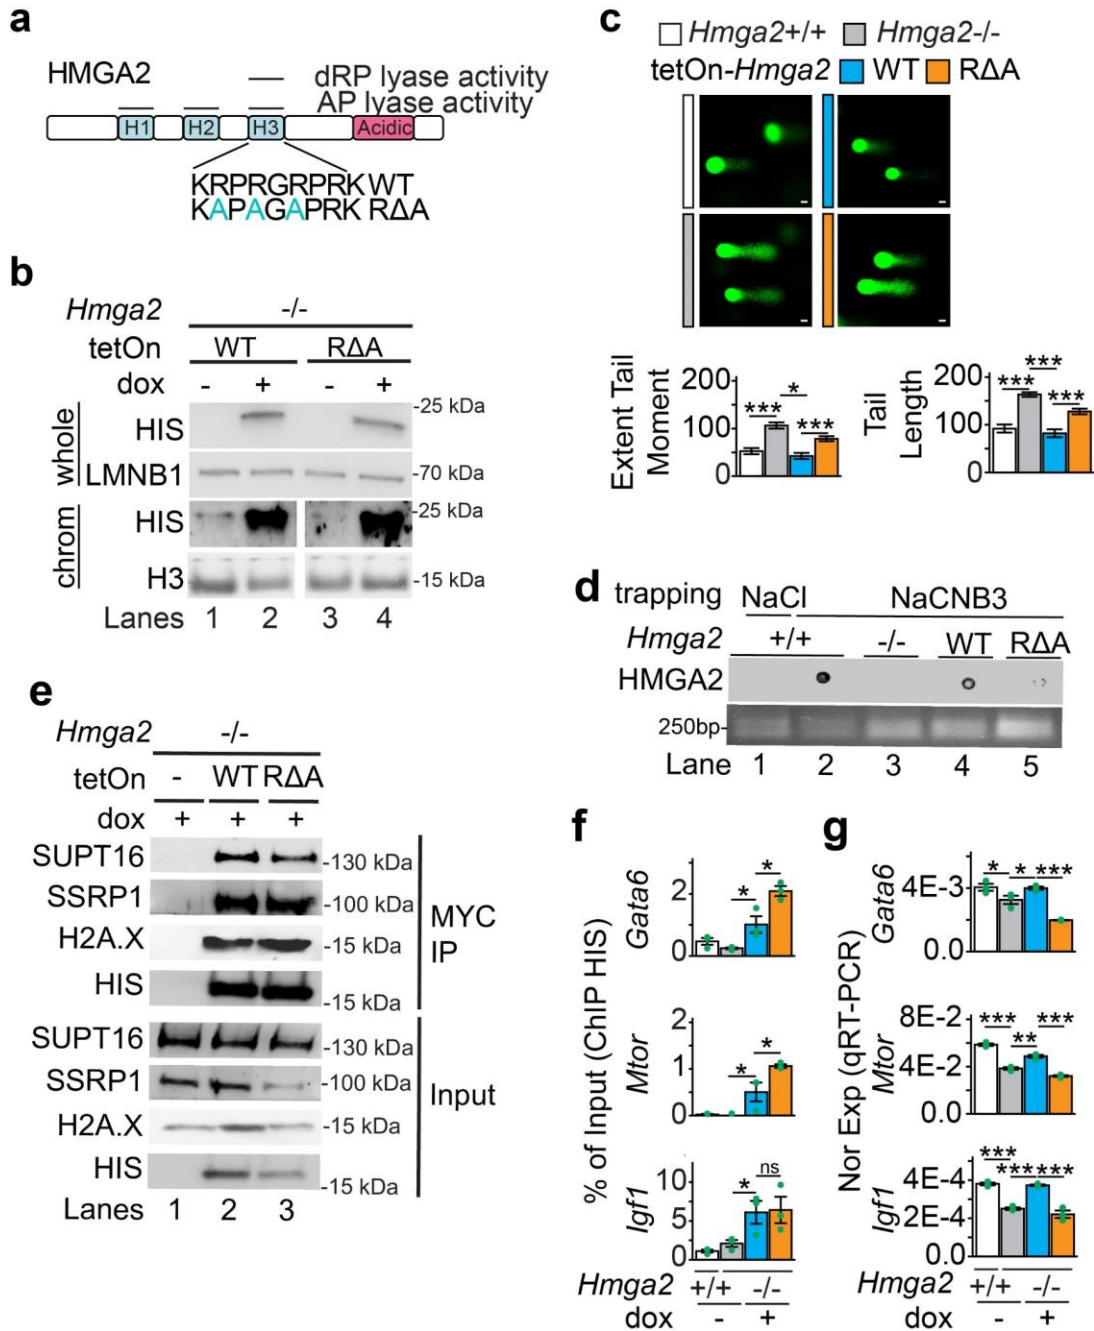

**Supplementary Figure 6: Lyase activity-dependent pH2A.X deposition is required for pPol II enrichment and gene transcription.** (a) Schematic representation of HMGA2 comprising AP lyase activity within the three AT-hook domains (H1-3) and a 5'-desoxyribose phosphate (dRP) lyase activity. Arginine (R) residues were mutated to alanines to abolish lyase activity in the third

hook domain (RΔA mutant). (b) WB analysis of nuclear lysate (top) and chromatin (bottom) of *Hmga2*<sup>-/-</sup> MEF that were stably transfected with a tetracycline-inducible expression construct (tetOn) either for WT *Hmga2-myc-his* or the lyase-deficient mutant RΔA *Hmga2-myc-his* using the indicated antibodies. LMNB1 and H3 were used as a loading control. (c) Top, representative images of comet assay using *Hmga2*<sup>+/+</sup>, *Hmga2*<sup>-/-</sup> MEF, as well as *Hmga2*<sup>-/-</sup> MEF that were stably transfected with a tetracycline-inducible expression construct (tetOn) either for WT *Hmga2-myc-his* or the lyase-deficient mutant RΔA *Hmga2-myc-his*. Cells were treated for 6 h with doxycycline. Bottom, quantification of extent tail moment and tail length in imaged MEF ( $n=28$  for *Hmga2*<sup>+/+</sup>,  $n=24$  for *Hmga2*<sup>-/-</sup>,  $n=27$  for *Hmga2*<sup>-/-</sup> tetOn WT *Hmga2-myc-his* and  $n=32$  for *Hmga2*<sup>-/-</sup> RΔA *Hmga2-myc-his* cells examined from one representative experiment). Scale bars, 50 μm. (d) Dot-blot confirming the impaired lyase activity of the RΔA mutant. A control for the amount of DNA loaded is shown below the blot. (e) Immunoprecipitation of HMGA2 from nuclear protein extracts of *Hmga2*<sup>-/-</sup> MEF, as well as *Hmga2*<sup>-/-</sup> MEF that were stably transfected with a tetracycline-inducible expression construct (tetOn) either for WT *Hmga2-myc-his* or the lyase-deficient mutant RΔA *Hmga2-myc-his* using MYC-coated magnetic beads. Co-immunoprecipitated proteins were analyzed by WB using the indicated antibodies. Input (Inp), 4% of material used for the IP. (f) ChIP analysis of HMGA2 targets using a HIS-tag specific antibody with chromatin isolated from *Hmga2*<sup>+/+</sup>, *Hmga2*<sup>-/-</sup> MEF, as well as *Hmga2*<sup>-/-</sup> MEF that were stably transfected with a tetracycline-inducible expression construct (tetOn) either for WT *Hmga2-myc-his* or the lyase-deficient mutant RΔA *Hmga2-myc-his*. Cells were treated for 4h with doxycycline as indicated. (g) QRT-PCR analysis using *Hmga2*<sup>+/+</sup>, *Hmga2*<sup>-/-</sup> MEF, as well as *Hmga2*<sup>-/-</sup> MEF that were stably transfected with a tetracycline-inducible expression construct (tetOn) either for WT *Hmga2-myc-his* or the lyase-deficient mutant RΔA *Hmga2-myc-his*. Cells

were treated for 6h with doxycycline. Images in panels (b) to (e) are representative for three independent experiments. In all plots, data are displayed as means  $\pm$  s.e.m ( $n=3$  independent experiments); asterisks,  $P$  values after two-tailed (in c) or one-tailed (in f and g)  $t$ -Test, \*\*\* $P \leq 0.001$ ; \*\* $P < 0.01$ ; \* $P \leq 0.05$ ; ns, non-significant. Source data are provided as a Source Data file 01 and 02.

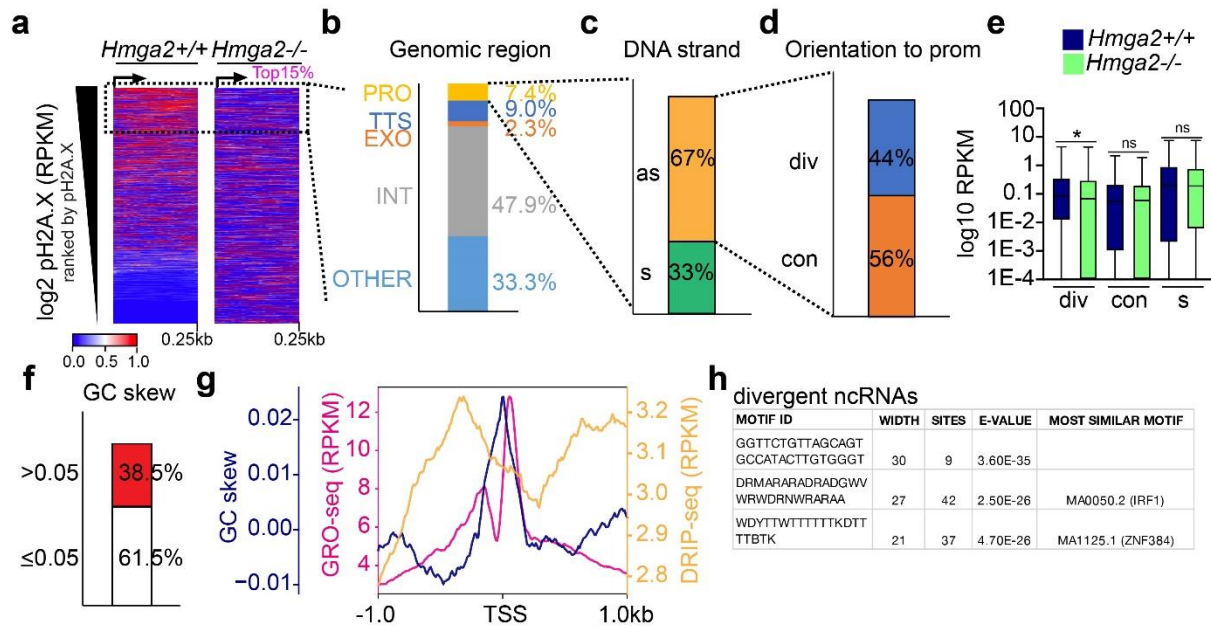

**Supplementary Figure 7: Characterization of ncRNAs transcribed from the top 15% HMGA2 candidate genes.** (a) Heat map for pH2A.X enrichment at the TSS +0.25kb of UCSC Known Genes in *Hmga2*<sup>+/+</sup> and *Hmga2*<sup>-/-</sup> MEF. Genes were ranked by pH2A.X enrichment in *Hmga2*<sup>+/+</sup> MEF. Dotted square, the top 15% ranked genes. (b) Distribution of ncRNA loci in close proximity to the top 15% candidate gene bodies  $\pm$  5kb; PRO, promotor; TTS, transcription termination site; EXO, exon; INT, intron. (c) Analysis of the orientation of ncRNAs towards the corresponding top 15% candidate genes; as, antisense; s, sense. (d) Subclassification of antisense ncRNAs; div, divergent; con, convergent. (e) Box plot representing the basal transcription activity (as log<sub>10</sub> RPKM) of ncRNA in *Hmga2*<sup>+/+</sup> and *Hmga2*<sup>-/-</sup> MEF. Box plots indicate median (middle line), 25th, 75th percentile (box) and 5th and 95th percentile (whiskers);  $n=621$  ncRNAs for divergent (div);  $n=780$  ncRNAs for convergent (con);  $n=698$  ncRNAs for sense (S) from one sequencing experiment; asterisks,  $P$  values after two-tailed Wilcoxon-Mann-Whitney test, \*  $P \leq 0.05$ ; ns, non-significant. Source data are provided as a Source Data file 01. (f) Bar chart highlighting the distribution of the top 15% genes with a high GC skew (>0.05). Values represent

the average score in the TSS+250bp region. (g) Aggregate plot representing the global distribution of nascent RNA (GRO-seq) in WT MEF of the top 15 % candidate genes with associated antisense ncRNA, GC skew and RNA-DNA hybrids (DRIP-seq) in NIH/3T3 murine fibroblasts. Reads were normalized using an RPKM measure. TSS, transcription start site; kb, kilobases). (h) Table of the enriched transcription factor motifs in divergent ncRNA sequences using HOMER.

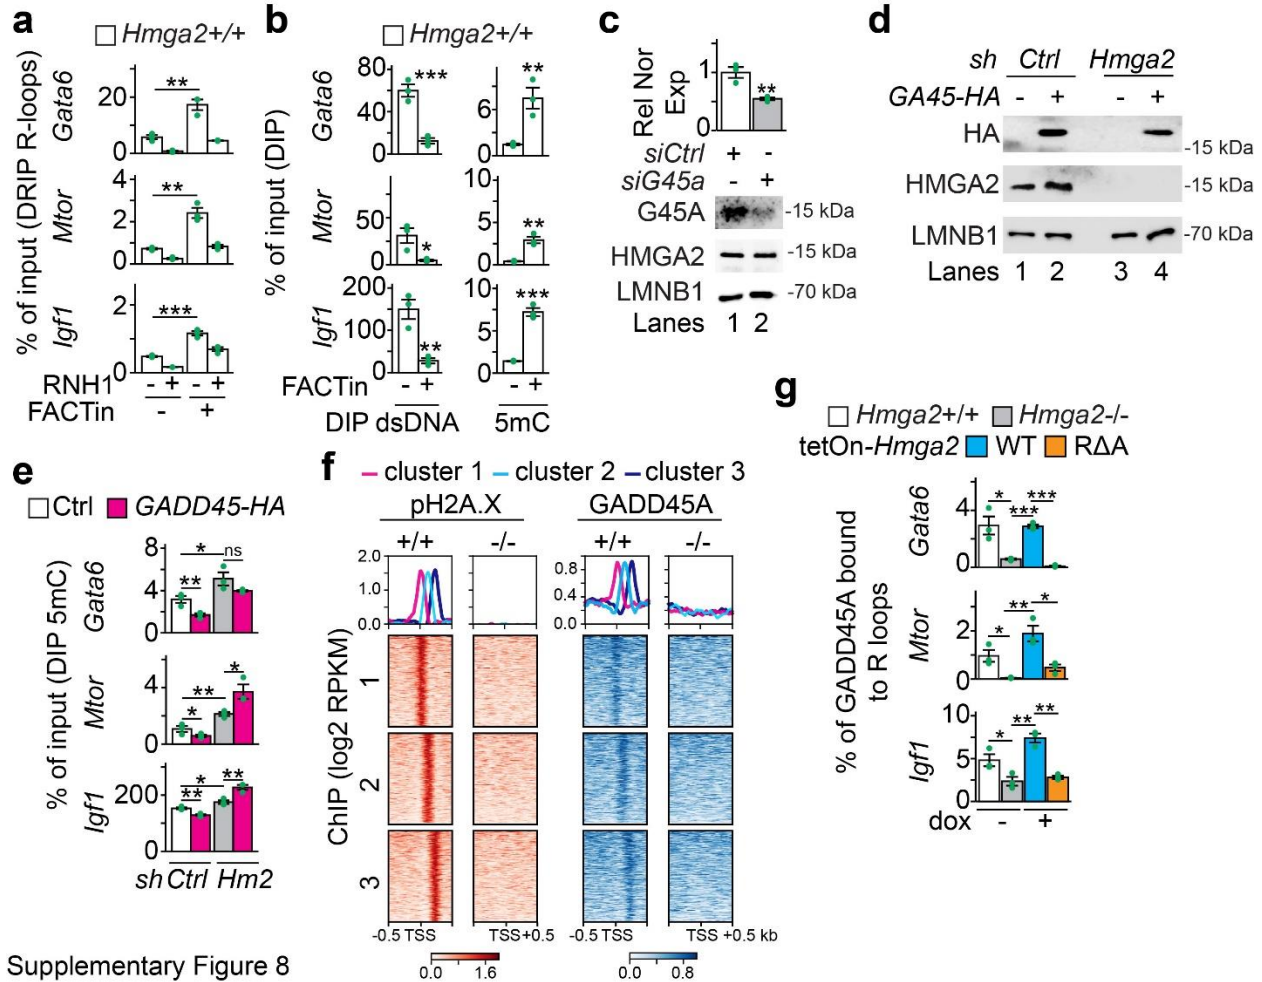

Supplementary Figure 8

**Supplementary Figure 8: R-Loops correlate with pH2A.X enrichment and GADD45A-induced DNA demethylation.** (a) Analysis of R-loops at the TSS of the selected HMGA2 target genes in *Hmga2*<sup>+/+</sup> MEF treated for 4 h with FACTin as indicated. (b) Analysis of dsDNA and 5mC as in a. (c) qRT-PCR analysis and WB for *Gadd45a* expression in *Hmga2*<sup>+/+</sup> MEF after siRNA-mediated KD. (d) and (e) WB analysis (d) and DIP for 5mC (e) after overexpression of *GADD45A* tagged with HA in MLE-12 cells that were stably transfected either with a control (scramble, *scr*) or an *Hmga2*-specific short hairpin DNA (*sh*) construct. WB images in (d) are representative for two independent experiments. (f) Aggregate plot and heat maps for pH2A.X and GADD45A enrichment at the TSS  $\pm$  0.5kb of the top 15 % candidate genes in *Hmga2*<sup>+/+</sup> and

*Hmga2*<sup>-/-</sup> MEF within the same clusters identified in Fig. 2e. (g) DRIP followed by sequential ChIP for GADD45A in *Hmga2*<sup>+/+</sup>, *Hmga2*<sup>-/-</sup> MEF, as well as *Hmga2*<sup>-/-</sup> MEF that were stably transfected with a tetracycline-inducible expression construct (tetOn) either for WT *Hmga2*-myc-*his* or the lyase-deficient mutant RΔA *Hmga2*-myc-*his*. Cells were treated for 4h with doxycycline. In all plots, data are displayed as means ± s.e.m (*n*=3 biologically independent experiments); asterisks, *P* values after two-tailed *t*-Test, \*\*\**P* ≤ 0.001; \*\**P* ≤ 0.01; \**P* ≤ 0.05; ns, non-significant. Source data are provided as a Source Data file 01 and 02.

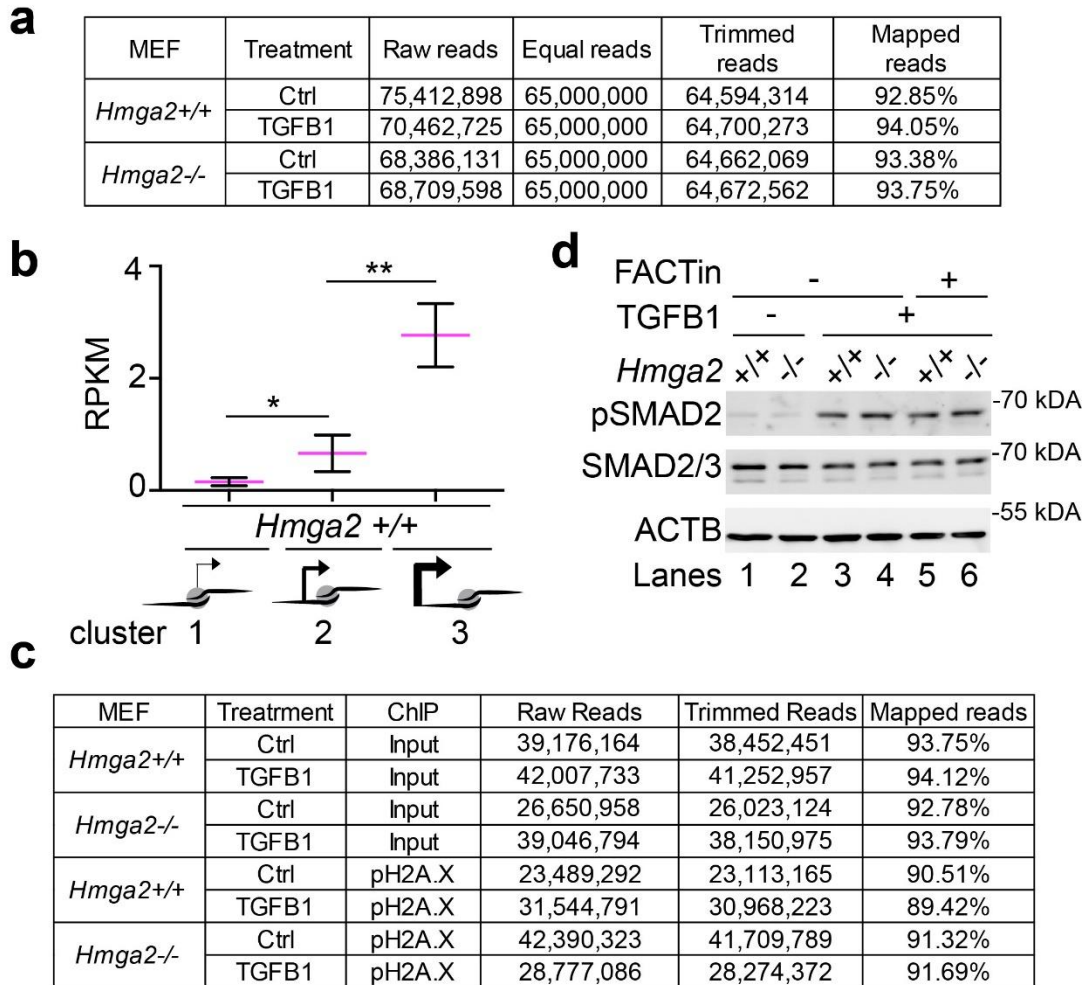

**Supplementary Figure 9: GADD45A is required for TGFB1-enhanced active DNA methylation.** (a) and (c) Descriptions of the RNA-seq data and TGFB1 ChIP-seq set support the quality of the experiments. (b) TGFB1-inducible genes in WT MEF were selected from Figure 3b and their expression was analyzed in *Hmga2*<sup>+/+</sup> and *Hmga2*<sup>-/-</sup> MEF measured by RPKM. Data are displayed as means  $\pm$  s.e.m ( $n=36$  genes in position cluster 1,  $n=21$  genes in position cluster 2 and  $n=35$  genes in position cluster 3 from one sequencing experiment); asterisks,  $P$  values after one-tailed Wilcoxon-Mann-Whitney test, \*\*  $P \leq 0.01$ ; \*  $P \leq 0.05$ . (d) WB analysis of phosphorylated Smad2 (Ser465/467), pSMAD) and total SMAD2/3 of *Hmga2*<sup>+/+</sup> and *Hmga2*<sup>-/-</sup>



MEF treated with TGFB1 alone or in combination with FACTin. Images are representative for three independent experiments. Source data are provided as a Source Data file 01 and 02.

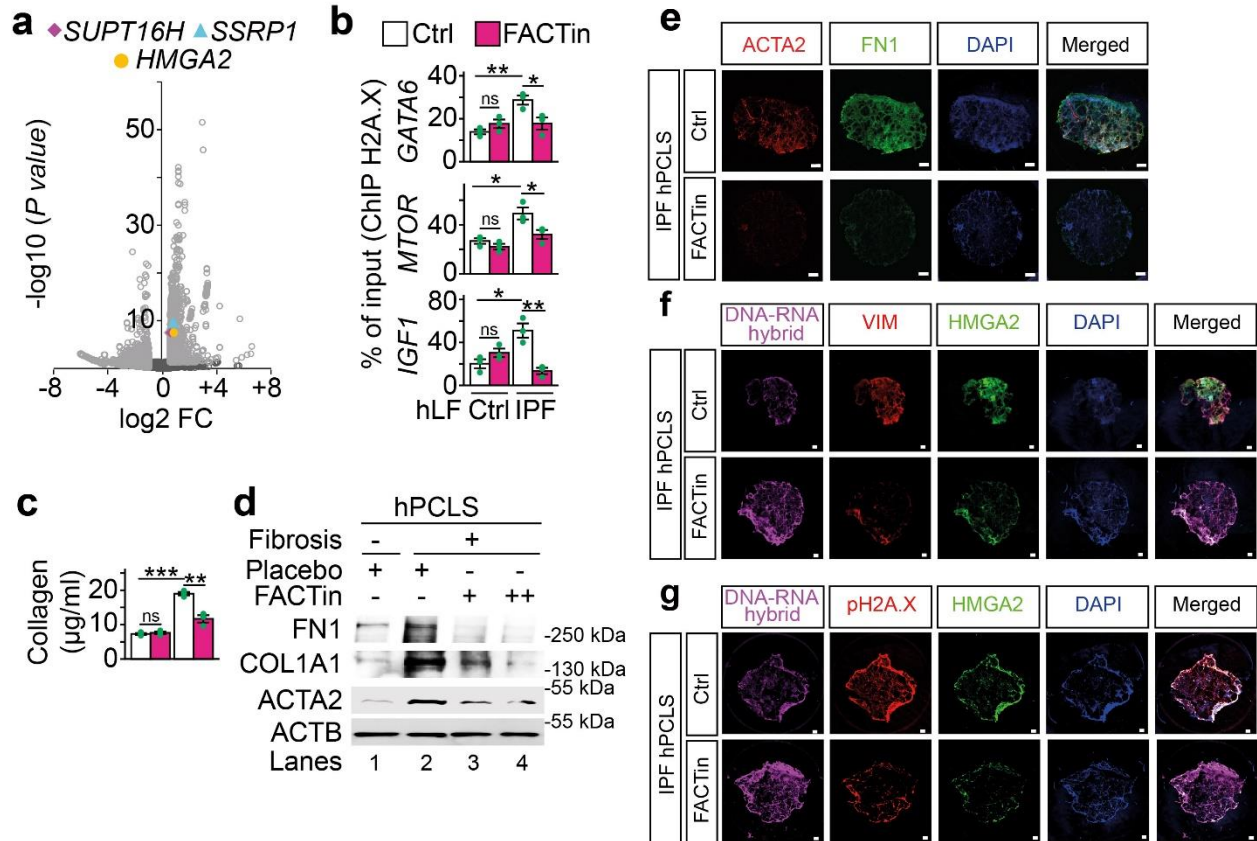

**Supplementary Figure 10: FACTin reduces fibrotic markers and pH2A.X levels in PCLS.**

(a) Volcano plot representing the significance ( $-\log_{10} P$  values after Wald  $t$ -test) vs. expression fold change ( $\log_2$  expression ratio) between two Ctrl and two IPF patients. Fold changes of *SUPT16H*, *SSRP1* and *HMGA2* in IPF are highlighted. Light grey color marks genes with a  $FC > 1.5$  and  $P < 0.05$ . (b) ChIP-based promoter analysis of selected *HMGA2* target genes using H2A.X-specific antibody and chromatin from hLF treated as in Fig. 7d. (c) Quantification of collagen content in Ctrl and IPF hLF treated with Ctrl or FACTin for 24h. In all bar plots, data are shown as means  $\pm$  s.e.m. ( $n=3$  biologically independent experiments); asterisks,  $P$  values after two-tailed  $t$ -Test, \*\*\*  $P \leq 0.001$ ; \*\*  $P \leq 0.01$ ; \*  $P \leq 0.05$ ; ns, non-significant. (d) WB analysis of IPF markers in Ctrl and IPF human precision-cut lung slices (hPCLS) treated with FACTin using the indicated antibodies. (e) to (g) Representative pictures of confocal microscopy after immunostaining using

ACTA2, FN1, S9.6, VIM, HMGA2 or pH2A.X -specific antibody in hPCLS from IPF patients. The hPCLS were treated as in Figure 9i. ACTA2, smooth muscle actin alpha 2; FN1, fibronectin; VIM, vimentin; DAPI, nucleus. Scale bars, 500  $\mu$ m. Images presented in panels (d) to (g) are representative for three independent experiments. Source data are provided as a Source Data file 01 and 02.

**Supplementary Table 1: Primer sequences and sequences of shRNA constructs**

| Gene                                                          |             | Primer Sequence (5'-3') |                                      |
|---------------------------------------------------------------|-------------|-------------------------|--------------------------------------|
| Cloning                                                       |             |                         |                                      |
| <i>Hmga2</i>                                                  | Cloning     | Forward                 | AAGCTAGCATGAGCGCACGCGGTGAGGGCG       |
|                                                               |             | Reverse                 | AAGGATCCTCAATGGTGATGGTGATGATGACCGGTA |
| <i>Hmga2</i><br><i>R75A</i>                                   | Mutagenesis | Forward                 | GGAGAAAAAGCGCCAAGAGGCAGACCTAGGAAATGG |
|                                                               |             | Reverse                 | CCATTTCTAGGTCTGCCTCTTGGCGCTTTTTCTCC  |
| <i>Hmga2</i><br><i>R75A</i> ,<br><i>R77A</i>                  | Mutagenesis | Forward                 | GGAGAAAAAGCGCCAGCAGGCAGACCTAGGAAATGG |
|                                                               |             | Reverse                 | CCATTTCTAGGTCTGCCTGCTGGCGCTTTTTCTCC  |
| <i>Hmga2</i><br><i>R75A</i> ,<br><i>R77A</i> ,<br><i>R79A</i> | Mutagenesis | Forward                 | GGAGAAAAAGCGCCAGCAGGCGCACCTAGGAAATGG |
|                                                               |             | Reverse                 | CCATTTCTAGGTGCGCCTGCTGGCGCTTTTTCTCC  |
| Gene expression                                               |             |                         |                                      |
| <i>Hmga2</i>                                                  | qPCR        | Forward                 | GCAGCAGCAAGAGCCAACCTG                |
|                                                               |             | Reverse                 | GTCTCTTCAGTCTCCTGAGCA                |
| <i>Gata6</i>                                                  | qPCR        | Forward                 | GCCCCGAAACGCTTCGGCAG                 |
|                                                               |             | Reverse                 | TTTGGGGTGGCCTCGGCTCT                 |
| <i>Mtor</i>                                                   | qPCR        | Forward                 | CGTCACAATGCAGCCAACAA                 |
|                                                               |             | Reverse                 | TGCCTTTCACGTTCTCTCC                  |
| <i>Igf1</i>                                                   | qPCR        | Forward                 | GAGCTTACTGGCGGCTGCTT                 |
|                                                               |             | Reverse                 | GGCAAGTGACAGAGGCAGCA                 |
| <i>Rptor</i>                                                  | qPCR        | Forward                 | GTGCCGAGCATATGCCAAAG                 |
|                                                               |             | Reverse                 | TCCCACTCGTGCAGTTTCTC                 |
| <i>Tuba1a</i>                                                 | qPCR        | Forward                 | CCGCGAAGCAGCAACCAT                   |
|                                                               |             | Reverse                 | CCAGGTCTACGAACACTGCC                 |
| <i>Gadd45a</i>                                                | qPCR        | Forward                 | TGCTGCTACTGGAGAACGAC                 |
|                                                               |             | Reverse                 | TCCATGTAGCGACTTTCCCG                 |
| <i>GATA6</i>                                                  | qPCR        | Forward                 | TTGACTGACGGCGGCTGGTG                 |
|                                                               |             | Reverse                 | CTCCCGCGCTGGAAAGGCTC                 |
| <i>MTOR</i>                                                   | qPCR        | Forward                 | GTGTGTGGAGACAGGGGCTT                 |
|                                                               |             | Reverse                 | TCTGGGTCTTGGGCATGTCG                 |
| <i>IGF1</i>                                                   | qPCR        | Forward                 | GTGTGTGGAGACAGGGGCTT                 |

|                                     |      |                |                         |
|-------------------------------------|------|----------------|-------------------------|
|                                     |      | Reverse        | TCTGGGTCTTGGGCATGTCG    |
| <i>FNI</i>                          | qPCR | Forward        | CATGAAGGGGGTCAGTCCTA    |
|                                     |      | Reverse        | CTTCTCAGCTATGGGCTTGC    |
| <i>COL1A</i>                        | qPCR | Forward        | AAGCGAGGAGCTCGAGGTGAAC  |
|                                     |      | Reverse        | TTGGCACCAGGCAGACCAGCTT  |
| <i>HPRT1</i>                        | qPCR | Forward        | TTTGCTTTCCTTGGTCAGGCAGT |
|                                     |      | Reverse        | CGTGGGGTCCTTTTCACCAGCA  |
| <i>ACTA2</i>                        | qPCR | Forward        | TGAGCTTCGTGTTGCCCTG     |
|                                     |      | Reverse        | GTAACGAAGGAATAGCCACGC   |
| Chromatin-Immunoprecipitation Assay |      |                |                         |
| <i>Igf1 TSS</i>                     | ChIP | Forward        | GTGAATCGGCTGCTGCTTGC    |
|                                     |      | Reverse        | GGCAGAACATAGACAGCGGCA   |
| <i>Gata6 TSS</i>                    | ChIP | Forward        | GTCGCGGCCGTTCTTCTCGC    |
|                                     |      | Reverse        | GGTGGAGGCTGGTCCGGAGT    |
| <i>Mtor TSS</i>                     | ChIP | Forward        | CTAGAAGACAGCGGGGAAGG    |
|                                     |      | Reverse        | CACACTGGCTGGGAGTCTG     |
| <i>Rptor TSS</i>                    | ChIP | Forward        | TTTGGCTTATTGGACGCGCC    |
|                                     |      | Reverse        | GAGTCCCGATACACACGCGA    |
| <i>IGF1 TSS</i>                     | ChIP | Forward        | AGATAGAGCCTGCGCAATGGA   |
|                                     |      | Reverse        | CGAGGAGGACATGGTGTGCA    |
| <i>GATA6 TSS</i>                    | ChIP | Forward        | TTCCCTCCTTCCCTCCGGGC    |
|                                     |      | Reverse        | TAACTACCGGCTCCCGCCCC    |
| <i>MTOR TSS</i>                     | ChIP | Forward        | TGTCGATTGGTCCTCAGGGC    |
|                                     |      | Reverse        | TGGACATTACGCCGCCCTAG    |
| Nick assay                          |      |                |                         |
| <i>Gata6 nick</i>                   | QPCR | Fwd flank      | ACATCGCTCGAGGTTTCGGTT   |
|                                     |      | Rwd flank      | ACACACAGACCCAGGCAAGATA  |
|                                     |      | Sense nick     | GGTGTCCGGTCCTTCGCTTTA   |
|                                     |      | Antisense nick | TAAAGCGAAGGACCGGACAC    |
| <i>Mtor nick</i>                    | QPCR | Fwd flank      | TGGTTGTAGCGCTTACGA      |

|                   |      |                |                       |
|-------------------|------|----------------|-----------------------|
|                   |      | Rwd flank      | GAGAAGGAGACCTAAATGCTC |
|                   |      | Sense nick     | AGTCTGGGGCCTGGAGT     |
|                   |      | Antisense nick | ACTCCAGGCCCCAGACT     |
| <i>Igf1</i> nick  | QPCR | Fwd flank      | TAAGGCTCTGCTCTTAGACTC |
|                   |      | Rwd flank      | CAACTGCCTCCAAGGAGC    |
|                   |      | Sense nick     | TTGCCTCTGGCTCTGTCTG   |
|                   |      | Antisense nick | CGACAGAGCCAGAGGCAA    |
| <i>Rptor</i> nick | QPCR | Fwd flank      | AGTCCCGATAGTCTTAT     |
|                   |      | Rwd flank      | TCTACGGCGCGTCCAATAA   |
|                   |      | Sense nick     | TAACTGAACGGACATAGT    |

| Vector name      |                | Target sequence              |
|------------------|----------------|------------------------------|
| pLKO.1-scrambled | Scrambled      | 5'-GCAAGCTGACCCTGAAGTTCAT-3' |
| pLKO.1-shHmga2   | TRCN0000126045 | 5'-GCCACAACAAGTCGTTTCAGAA-3' |

**Supplementary Table 2: Key Resources Table**

| <b>REAGENT or RESOURCE</b>     | <b>SOURCE</b>                  | <b>IDENTIFIER</b>             |
|--------------------------------|--------------------------------|-------------------------------|
| <b>Antibodies</b>              |                                |                               |
| 5mC                            | Abcam                          | ab10805                       |
| ACTA2                          | Sigma                          | A5228                         |
| ACTB                           | Sigma                          | A5316                         |
| AKT                            | Cell Signaling                 | 9272S                         |
| AlexaFluor488 goat anti-rabbit | Invitrogen                     | A11008                        |
| AlexaFluor555 donkey anti-goat | Invitrogen                     | A21432                        |
| AlexaFluor594 goat anti-mouse  | Invitrogen                     | A11005                        |
| COL1A1                         | Sigma                          | C2456                         |
| dsDNA                          | Abcam                          | ab27156                       |
| FN1                            | Millipore                      | AB2033                        |
| Gadd45a                        | Santacruz                      | sc-797<br>sc-6850             |
| HA-tag                         | Santa Cruz                     | #sc-805                       |
| Histone H3 (ChIP Grade)        | Abcam                          | ab1791                        |
| Histone H2A.X                  | Millipore                      | 07-627                        |
| H2A.XS139ph                    | Millipore                      | 05-636<br>07-164              |
| Histone H2A                    | Abcam                          | #18255                        |
| Histone H4                     | Abcam                          | #7311                         |
| Histone H2B                    | Abcam                          |                               |
| His-tag                        | Abcam                          | ab9108                        |
| HMGA2                          | Abcam<br>Santa Cruz<br>CST     | ab41878<br>sc- 30223<br>8179S |
| LMNB1                          | Santa Cruz                     | sc-6216                       |
| Mouse Control IgG              | Santa Cruz Biotechnology, INC. | sc-2025                       |
| Donkey-anti mouse HRP          | Jackson                        | 715-035-150                   |
| SMAD2/3                        | Cell Signaling                 | 3102S                         |
| pSMAD2 (S465/467)              | Cell Signaling                 | 3101S                         |
| Rabbit Control IgG             | Santa Cruz Biotechnology, INC. | sc-2027                       |
| DNA-RNA hybrid [S9.6]          | Kerafast                       | ENH001                        |

|                                                                         |                           |            |
|-------------------------------------------------------------------------|---------------------------|------------|
| RNA polymerase II CTD repeat YSPTSPS (phospho S5) antibody (ChIP Grade) | Abcam                     | ab5408     |
| RNA polymerase II CTD repeat YSPTSPS (ChIP Grade)                       | Abcam                     | ab26721    |
| SMAD3                                                                   | Abcam                     | ab408554   |
| SMAD3 (phospho S423+S425)                                               | Abcam                     | Ab52903    |
| SPT16                                                                   | Cell Signaling            | 12191      |
| SSRP1                                                                   | BioLegend                 | 609710     |
| TET1                                                                    | Active Motif              | 61443      |
| VIM                                                                     | Cell Signaling            | 5741S      |
| <b>Chemicals and Reagents</b>                                           |                           |            |
| Protein A Agarose/Salmon Sperm DNA                                      | Millipore                 | 16-157     |
| Bovine Serum Albumin (BSA)                                              | Carl Roth                 | 8076.1     |
| Pierce™ Coomassie Plus (Bradford) Assay Kit                             | Thermo Fisher Scientific  | 23236      |
| CBLC000 trifluoroacetate                                                | Sigma Aldrich             | SML1974    |
| Chloroform                                                              | Carl Roth                 | 3313.1     |
| DMEM, high glucose, pyruvate                                            | Thermo Fisher             | 11995065   |
| DMEM F-12 Ham                                                           | Corning                   | 10-092-CM  |
| DMSO                                                                    | Sigma Aldrich             | D2438      |
| DPBS                                                                    | Thermo Fischer Scientific | 14190250   |
| Doxycycline                                                             | Sigma Aldrich             | D9891      |
| Dulbecco's medium : Ham's F12                                           | Gibco                     | 11320033   |
| Dynabeads® Protein A                                                    | Invitrogen                | 10002D     |
| Formaldehyde                                                            | Sigma Aldrich             | 252549     |
| Gemcitabine                                                             | Sigma Aldrich             | G6423      |
| KU-55933                                                                | Calbiochem                | 118500-2MG |
| Lipofectamine 2000                                                      | Invitrogen                | 11668027   |
| Lipofectamine 3000                                                      | Invitrogen                | L3000008   |
| Luria broth                                                             | Roth                      | X964.1     |
| Luria broth agar                                                        | Roth                      | 6671.1     |



|                                               |                                                                        |                |
|-----------------------------------------------|------------------------------------------------------------------------|----------------|
| 4–20% Mini-PROTEAN® TGX™ Precast Protein Gels | Bio-Rad                                                                | 4561095        |
| Nuclease-free water                           | Thermo Fisher Scientific                                               | AM9937         |
| Penicillin Streptomycin                       | Thermo Fisher Scientific                                               | 10378016       |
| Polyallomer centrifuge tube                   | Beckman                                                                | 344059         |
| Polybrene                                     | Sigma Aldrich                                                          | TR-1003        |
| Protease Inhibitor Cocktail Set I             | Calbiochem                                                             | 539131         |
| Puromycin                                     | Sigma Aldrich                                                          | P8833          |
| siCtrl                                        | Ambion                                                                 | AM4611         |
| siGadd45a                                     | Ambion                                                                 | AM16708        |
| Protein G Sepharose 4 Fast Flow               | GE Healthcare                                                          | 17061801       |
| Sodium Chloride                               | Carl Roth                                                              | 9265.1         |
| Sodium-cyanoborohydride                       | Sigma Aldrich                                                          | 296945         |
| HighPrep™ PCR Clean-up System                 | Magbio                                                                 | AC-60250       |
| STAGE tips                                    | In-house produced from Empore Octadecyl C18 Extraction Disks (Supelco) | 66883-U        |
| Sucrose                                       | Sigma Aldrich                                                          | S0389-1KG      |
| Transforming Growth Factor Beta               | Sigma Aldrich                                                          | T7039          |
| TRIzol® Reagent                               | Thermo Fisher Scientific                                               | 15596018       |
| Triton-X100                                   | Sigma Aldrich                                                          | T8787          |
| Ultra-pure Phenol: Chloroform                 | Invitrogen                                                             | 15593031       |
| <b>Critical Commercial Assays and Kits</b>    |                                                                        |                |
| 660 nm protein assay                          | Pierce                                                                 | 1861426        |
| 6-plex tandem mass tags                       | Thermo Fisher Scientific                                               | 90063          |
| Pierce™ Anti-c-Myc Magnetic Beads             | Thermo Scientific                                                      | 88842          |
| Comet Assay                                   | Abcam                                                                  | ab238544       |
| LDH Cytotoxicity Detection Kit                | Roche                                                                  | 11 644 793 001 |
| High-Capacity cDNA Reverse Transcription Kit  | Thermo Fisher Scientific                                               | 4368814        |
| Ovation Ultralow System V2                    | Nugen                                                                  | 0344NB         |

|                                                           |                          |                                                                                                                                                               |
|-----------------------------------------------------------|--------------------------|---------------------------------------------------------------------------------------------------------------------------------------------------------------|
| Power SYBR Green Master Mix                               | Thermo Fisher Scientific | 4368708                                                                                                                                                       |
| QIAquick PCR purification kit                             | Qiagen                   | 28106                                                                                                                                                         |
| SMARTer Stranded Total RNA Sample Prep Kit - HI Mammalian | Clontech                 | 634875                                                                                                                                                        |
| TruSeq ChIP Library Preparation Kit                       | Illumina                 | IP-202-1012                                                                                                                                                   |
| Quantitative fluorimetric peptide assay                   | Pierce                   | 23290                                                                                                                                                         |
| Qubit dsDNA HS Assay Kit                                  | Thermo Fisher Scientific | Q32854                                                                                                                                                        |
| QuikChange II Site-Directed Mutagenesis Kit               | Agilent                  | 200523                                                                                                                                                        |
| WesternBright ECL detection solution                      | Biozym                   | 541004                                                                                                                                                        |
| <b>Enzymes</b>                                            |                          |                                                                                                                                                               |
| BsrGI                                                     | New England Biolabs      | R3575S                                                                                                                                                        |
| EcoRI                                                     | New England Biolabs      | R3101S                                                                                                                                                        |
| HindIII-HF                                                | New England Biolabs      | R3104S                                                                                                                                                        |
| Lys-C                                                     | Wako Chemicals GmbH      | 129-02541                                                                                                                                                     |
| Micrococcus nuclease                                      | New England Biolabs      | M0247S                                                                                                                                                        |
| RNase A                                                   | Sigma Aldrich            | 70856-3                                                                                                                                                       |
| SspI                                                      | New England Biolabs      | R3132S                                                                                                                                                        |
| Trypsin                                                   | Serva                    | 37286.03                                                                                                                                                      |
| Proteinase K                                              | Sigma Aldrich            | 70663<br>P2308                                                                                                                                                |
| Oligo R3                                                  | Thermo Fisher Scientific | 1-1339-06                                                                                                                                                     |
| XbaI                                                      | New England Biolabs      | R0145S                                                                                                                                                        |
| <b>Deposited Data</b>                                     |                          |                                                                                                                                                               |
| RNA-Seq                                                   | This paper               | GEO: GSE141266<br>[ <a href="https://www.ncbi.nlm.nih.gov/geo/query/acc.cgi?acc=GSE141266">https://www.ncbi.nlm.nih.gov/geo/query/acc.cgi?acc=GSE141266</a> ] |
| Proteomics                                                | This paper               | PRIDE: PXD016586<br>[ <a href="https://www.ebi.ac.uk/pride/archive/projects/PXD016586">https://www.ebi.ac.uk/pride/archive/projects/PXD016586</a> ]           |
| H2A.X, H3, pPolII and GADD45A ChIP-Seq                    | This paper               | GEO: GSE141264<br>[ <a href="https://www.ncbi.nlm.nih.gov/geo/query/acc.cgi?acc=GSE141264">https://www.ncbi.nlm.nih.gov/geo/query/acc.cgi?acc=GSE141264</a> ] |
| pH2A.X, HMGA2 ChIP-Seq                                    | PMID: 26045162           | GEO: GSE63861<br>[ <a href="https://www.ncbi.nlm.nih.gov/geo/query/acc.cgi?acc=GSE63861">https://www.ncbi.nlm.nih.gov/geo/query/acc.cgi?acc=GSE63861</a> ]    |

|                                                                      |                |                                                                                  |
|----------------------------------------------------------------------|----------------|----------------------------------------------------------------------------------|
| MNase-Seq after Ultracentrifugation                                  | This paper     | GEO: GSE141265<br>[https://www.ncbi.nlm.nih.gov/geo/query/acc.cgi?acc=GSE141265] |
| DRIP-Seq in NIH/3T3 cells                                            | PMID: 27373332 | GEO: GSE70189<br>[https://www.ncbi.nlm.nih.gov/geo/query/acc.cgi?acc=GSE70189]   |
| SSRP1, SPT16 and pH2A.X, ChIP-Seq with and without TGFB1 treatment   | This paper     | GEO: GSE141271<br>[https://www.ncbi.nlm.nih.gov/geo/query/acc.cgi?acc=GSE141271] |
| Nuclear RNA-seq in Ctrl and IPF hLF                                  | PMID: 31110176 | GEO: GSE116086<br>[https://www.ncbi.nlm.nih.gov/geo/query/acc.cgi?acc=GSE116086] |
| GRO-Seq                                                              | PMID: 28424523 | GEO: GSE76303<br>[https://www.ncbi.nlm.nih.gov/geo/query/acc.cgi?acc=GSE76303]   |
| <b>Experimental Models: Cell Lines</b>                               |                |                                                                                  |
| <i>Hmga2</i> <sup>+/+</sup> Mouse Embryonic Fibroblasts (MEF), E15.5 | PMID: 26045162 | n/a                                                                              |
| <i>Hmga2</i> <sup>-/-</sup> MEF, E15.5                               | PMID: 26045162 | n/a                                                                              |
| <i>Hmga2</i> <sup>-/-</sup> MEF tetOn- <i>Hmga2</i> WT               | This paper     | n/a                                                                              |
| <i>Hmga2</i> <sup>-/-</sup> MEF tetOn- <i>Hmga2</i> RΔA              | This paper     | n/a                                                                              |
| HEK293T                                                              | ATCC           | ATCC® CRL-3216                                                                   |
| Healthy human lung fibroblasts                                       | PMID: 31110176 | n/a                                                                              |
| IPF-derived human lung fibroblasts                                   | PMID: 31110176 | n/a                                                                              |
| MLE-12 shScrambled                                                   | This paper     | n/a                                                                              |
| MLE-12 sh <i>Hmga2</i>                                               | This paper     | n/a                                                                              |
| <b>Experimental Models: Organisms/Strains</b>                        |                |                                                                                  |
| Top10 <i>E.coli</i>                                                  |                |                                                                                  |
| Ctrl and IPF-derived PCLS                                            |                |                                                                                  |
| <b>Recombinant DNA</b>                                               |                |                                                                                  |
| pCMVR8.74                                                            |                | Addgene: #22036                                                                  |
| pCW- <i>Hmga2</i> WT                                                 | This paper     | n/a                                                                              |
| pCW- <i>Hmga2</i> RΔA                                                | This paper     | n/a                                                                              |
| pcDNA3-HA+WT GADD45                                                  | PMID: 10973963 | Addgene: #24929                                                                  |
| pMD2.G                                                               |                | Addgene: #12259                                                                  |
| pLKO-scrambled                                                       | This paper     | n/a                                                                              |
| pLKO- <i>shHmga2</i>                                                 | This paper     | n/a                                                                              |

| <b>Sequence-Based Reagents n/a</b>        |                                   |                                                                                                                                                                                                               |
|-------------------------------------------|-----------------------------------|---------------------------------------------------------------------------------------------------------------------------------------------------------------------------------------------------------------|
| Primers for Cloning                       | Sigma Aldrich                     | See Supplementary Table 1                                                                                                                                                                                     |
| Primers for RT-qPCR                       | Sigma Aldrich                     | See Supplementary Table 1                                                                                                                                                                                     |
| Primers for CHIP- and DRIP-qPCR           | Sigma Aldrich                     | See Supplementary Table 1                                                                                                                                                                                     |
| Primers for Nick-qPCR                     | Sigma Aldrich                     | See Supplementary Table 1                                                                                                                                                                                     |
| <b>Software and Algorithms</b>            |                                   |                                                                                                                                                                                                               |
| analyzeRepeats.pl                         | HOMER                             | <a href="http://homer.salk.edu/homer/ngs/analyzeRNA.html">http://homer.salk.edu/homer/ngs/analyzeRNA.html</a>                                                                                                 |
| annotatePeaks.pl                          | HOMER                             | <a href="http://homer.ucsd.edu/homer/ngs/annotation.html">http://homer.ucsd.edu/homer/ngs/annotation.html</a>                                                                                                 |
| Bedtools                                  |                                   | <a href="https://bedtools.readthedocs.io/en/latest/">https://bedtools.readthedocs.io/en/latest/</a>                                                                                                           |
| Bowtie2                                   | PMID: 22388286                    | <a href="http://bowtie-bio.sourceforge.net/bowtie2/index.shtml">http://bowtie-bio.sourceforge.net/bowtie2/index.shtml</a>                                                                                     |
| Deeptools                                 | PMID: 27079975                    | <a href="https://deeptools.readthedocs.io/en/develop/">https://deeptools.readthedocs.io/en/develop/</a>                                                                                                       |
| DESeq2                                    | doi: 10.1186/s13059-014-0550-8.). | <a href="http://bioconductor.org/packages/development/bioc/vignettes/DESeq2/inst/doc/DESeq2.html">http://bioconductor.org/packages/development/bioc/vignettes/DESeq2/inst/doc/DESeq2.html</a>                 |
| FastQC                                    |                                   | <a href="https://www.bioinformatics.babraham.ac.uk/projects/fastqc/">https://www.bioinformatics.babraham.ac.uk/projects/fastqc/</a>                                                                           |
| fgsea                                     |                                   | <a href="https://www.bioconductor.org/packages/release/bioc/vignettes/fgsea/inst/doc/fgsea-tutorial.html">https://www.bioconductor.org/packages/release/bioc/vignettes/fgsea/inst/doc/fgsea-tutorial.html</a> |
| Hisat2                                    | PMID: 25751142                    | <a href="https://ccb.jhu.edu/software/hisat2/index.shtml">https://ccb.jhu.edu/software/hisat2/index.shtml</a>                                                                                                 |
| ImageJ                                    |                                   | <a href="https://imagej.nih.gov/ij/">https://imagej.nih.gov/ij/</a>                                                                                                                                           |
| MakeTagDirectories                        | HOMER                             | <a href="http://homer.ucsd.edu/homer/ngs/tagDir.html">http://homer.ucsd.edu/homer/ngs/tagDir.html</a>                                                                                                         |
| MARMoSET                                  | PMID: 31097673                    | <a href="https://github.com/molgen.mpg.de/loosolab/MARMoSET_C">https://github.com/molgen.mpg.de/loosolab/MARMoSET_C</a>                                                                                       |
| MASS                                      |                                   | <a href="https://www.rdocumentation.org/packages/MASS/versions/7.3-53">https://www.rdocumentation.org/packages/MASS/versions/7.3-53</a>                                                                       |
| MaxQuant suite of algorithms (v. 1.6.5.0) | PMID: 19029910                    | <a href="https://maxquant.org/">https://maxquant.org/</a>                                                                                                                                                     |
| MACS                                      | PMID: 21633945                    | <a href="https://taoliu.github.io/MACS/">https://taoliu.github.io/MACS/</a>                                                                                                                                   |
| Morpheus                                  |                                   | <a href="https://software.broadinstitute.org/morpheus/">https://software.broadinstitute.org/morpheus/</a>                                                                                                     |
| RNA hybrid-online server                  | PMID: 15383676                    | <a href="https://bibiserv.cebitec.uni-bielefeld.de/rnahybrid/">https://bibiserv.cebitec.uni-bielefeld.de/rnahybrid/</a>                                                                                       |
| RStudio: Integrated Development for R.    | RStudio Team (2015)               | <a href="http://www.rstudio.com/">http://www.rstudio.com/</a>                                                                                                                                                 |

|                     |                             |                                                                                                             |
|---------------------|-----------------------------|-------------------------------------------------------------------------------------------------------------|
| Samtools            |                             | <a href="http://www.htslib.org">http://www.htslib.org</a>                                                   |
| T-coffee            | PMID: 17526519              | <a href="http://tcoffee.crg.cat/">http://tcoffee.crg.cat/</a>                                               |
| trimmomatic v0.32   | PMID: 24695404              | <a href="http://www.usadellab.org/cms/?page=trimmomatic">http://www.usadellab.org/cms/?page=trimmomatic</a> |
| UCSC Genome Browser | Genome Bioinformatics Group | <a href="https://genome.ucsc.edu/">https://genome.ucsc.edu/</a>                                             |
| UCSC Table Browser  | Genome Bioinformatics Group | <a href="https://genome.ucsc.edu/cgi-bin/hgTables">https://genome.ucsc.edu/cgi-bin/hgTables</a>             |
| Webgestalt          | PMID: 31114916              | <a href="http://www.webgestalt.org/">http://www.webgestalt.org/</a>                                         |

## Supplementary References

1. Ozturk N, Singh I, Mehta A, Braun T, Barreto G. HMGA proteins as modulators of chromatin structure during transcriptional activation. *Front Cell Dev Biol* **2**, 5 (2014).
2. Bustin M. Revised nomenclature for high mobility group (HMG) chromosomal proteins. *Trends in biochemical sciences* **26**, 152-153 (2001).
3. Barkauskas CE, Noble PW. Cellular mechanisms of tissue fibrosis. 7. New insights into the cellular mechanisms of pulmonary fibrosis. *American journal of physiology Cell physiology* **306**, C987-996 (2014).
4. Summer H, *et al.* HMGA2 exhibits dRP/AP site cleavage activity and protects cancer cells from DNA-damage-induced cytotoxicity during chemotherapy. *Nucleic acids research* **37**, 4371-4384 (2009).
5. Jachimowicz RD, *et al.* UBQLN4 Represses Homologous Recombination and Is Overexpressed in Aggressive Tumors. *Cell* **176**, 505-519 e522 (2019).
6. Singh I, *et al.* Hmga2 is required for canonical WNT signaling during lung development. *BMC biology* **12**, 21 (2014).
7. Singh I, *et al.* High mobility group protein-mediated transcription requires DNA damage marker gamma-H2AX. *Cell research* **25**, 837-850 (2015).
8. Li Z, *et al.* An HMGA2-IGF2BP2 axis regulates myoblast proliferation and myogenesis. *Developmental cell* **23**, 1176-1188 (2012).
9. Brants JR, Ayoubi TA, Chada K, Marchal K, Van de Ven WJ, Petit MM. Differential regulation of the insulin-like growth factor II mRNA-binding protein genes by architectural transcription factor HMGA2. *FEBS letters* **569**, 277-283 (2004).
10. Blank-Giwojna A, Postepska-Igielska A, Grummt I. lncRNA KHPS1 Activates a Poised Enhancer by Triplex-Dependent Recruitment of Epigenomic Regulators. *Cell reports* **26**, 2904-2915 e2904 (2019).
11. Kuo CC, *et al.* Detection of RNA-DNA binding sites in long noncoding RNAs. *Nucleic acids research* **47**, e32 (2019).
12. Arab K, *et al.* GADD45A binds R-loops and recruits TET1 to CpG island promoters. *Nature genetics* **51**, 217-223 (2019).
13. Sgarra R, *et al.* Interaction proteomics of the HMGA chromatin architectural factors. *Proteomics* **8**, 4721-4732 (2008).
14. Fong YW, Cattoglio C, Tjian R. The intertwined roles of transcription and repair proteins. *Molecular cell* **52**, 291-302 (2013).
15. Singh I, *et al.* MiCEE is a ncRNA-protein complex that mediates epigenetic silencing and nucleolar organization. *Nature genetics* **50**, 990-1001 (2018).
16. Rubio K, *et al.* Inactivation of nuclear histone deacetylases by EP300 disrupts the MiCEE complex in idiopathic pulmonary fibrosis. *Nature communications* **10**, 2229 (2019).

17. Wang Y, Le Y, Xue JY, Zheng ZJ, Xue YM. Let-7d miRNA prevents TGF-beta1-induced EMT and renal fibrogenesis through regulation of HMGA2 expression. *Biochemical and biophysical research communications* **479**, 676-682 (2016).
18. Kugel S, *et al.* SIRT6 Suppresses Pancreatic Cancer through Control of Lin28b. *Cell* **165**, 1401-1415 (2016).
